# Supplementary material for: A machine learning approach for predicting the empirical polarity of organic solvents
Source: Royal Society of Chemistry journal article supplement (doi:10.1039/d2nj02513b), 2022-01-01
Supplement: d2nj02513b1.pdf [file d2nj02513b1.pdf]

# **Electronic Supplementary Information**

# A Machine Learning Approach for Predicting the Empirical Polarity of Organic Solvents

Vaneet Saini <sup>a\*</sup> and Ranjeet Kumar <sup>a</sup>

<sup>a</sup> Department of Chemistry & Centre for Advanced Studies in Chemistry, Panjab University, Chandigarh

160014, India, Email: [vsaini@pu.ac.in](mailto:vsaini@pu.ac.in)

## Contents

|                                                                                                                                                                                                      |    |
|------------------------------------------------------------------------------------------------------------------------------------------------------------------------------------------------------|----|
| A Machine Learning Approach for Predicting the Empirical Polarity of Organic Solvents .....                                                                                                          | 2  |
| General Information .....                                                                                                                                                                            | 3  |
| Descriptors .....                                                                                                                                                                                    | 3  |
| <b>Units</b> .....                                                                                                                                                                                   | 3  |
| <b>Descriptor Info</b> .....                                                                                                                                                                         | 3  |
| <b>Train:Test Split</b> .....                                                                                                                                                                        | 4  |
| References: .....                                                                                                                                                                                    | 11 |
| <br>                                                                                                                                                                                                 |    |
| Table S1. List of calculated quantum chemical descriptors used in this study.....                                                                                                                    | 3  |
| Table S2. List of total no. of molecules used in each class with their means $E_T(30)$ values. ....                                                                                                  | 3  |
| Table S3. Descriptor Statistics before and after standardization. ....                                                                                                                               | 4  |
| Table S4. Dataset size and train and test set sizes.....                                                                                                                                             | 4  |
| Table S5. Model evaluation metrics for NN model using 10% train test split. ....                                                                                                                     | 5  |
| Table S6. Model evaluation metrics for NN model using 20% train test split .....                                                                                                                     | 5  |
| Table S7. Model evaluation metrics for NN model using 30% train test split .....                                                                                                                     | 5  |
| Table S8. Model evaluation metrics for NN model using 40% train test split .....                                                                                                                     | 6  |
| Table S9. Train and test set metrics with change in the number of neurons in the NN model. ....                                                                                                      | 6  |
| Table S10. Actual and predicted $E_T(30)$ test set values along with the absolute error in the ascending order for 10% train test split using NN model. ....                                         | 6  |
| <br>                                                                                                                                                                                                 |    |
| Figure S1. Strip plot depicting range of $E_T(30)$ values across 13 different categories of solvents.....                                                                                            | 8  |
| Figure S2. Confusion matrix showing Pearson coefficient ( $r$ ) for 10 quantum chemical descriptors and $E_T(30)$ .....                                                                              | 9  |
| Figure S3. Regression and residual plots showing test and train data points and their $R^2$ values for; A) RF regression plot, B) NN regression plot, C) RF residual plot, D) NN residual plot. .... | 10 |

## General Information

The  $E_T(30)$  values were acquired from two sources.<sup>1, 2</sup> Molecules were drawn on Gauss View 6 and computations were performed on Gaussian 16 software.<sup>3</sup> The geometry optimization and frequency calculations were performed on B3LYP/631G++(d,p) for DFT. Minima was confirmed by vibrational frequency calculations showing no imaginary frequency. For machine learning all the calculations were performed on google colab using Python framework. Data analysis and pre-processing was done using Pandas, NumPy and Scikit-learn libraries. Model development was performed using Scikit-learn, Keras and Tensorflow libraries. Visualization of data was done on Seaborn and Matplotlib libraries. Code is available at <https://github.com/v-saini/Empirical-Polarity.git>

## Descriptors

### Units

Total energy (E), energies of HOMO and LUMO, electronegativity ( $\chi$ ), chemical hardness ( $\eta$ ), chemical potential ( $\mu$ ), electrophilicity index ( $\omega$ ), dipole moment (d), free energy (G), enthalpy (H) (all quantum-mechanical descriptors in a.u., 1a.u.=27.21165 eV, 627.50956 kcal/mol, thermodynamic descriptors in Kcal/mol, dipole moment in Debye calculated with DFT/B3LYP/6-311G(d,p) level of the theory).<sup>4</sup>

### Descriptor Info

**Table S1.** List of calculated quantum chemical descriptors used in this study.

| Sr. No | Notation                          | Definition                                       | Source/Formula                       |
|--------|-----------------------------------|--------------------------------------------------|--------------------------------------|
| 1      | E                                 | Total electronic energy-DFT                      | Gaussian 09                          |
| 2      | E (HOMO)                          | Energy of highest occupied molecular orbital-DFT | Gaussian 09                          |
| 3      | E (LUMO)                          | Energy of lowest occupied molecular orbital-DFT  | Gaussian 09                          |
| 4      | $\eta$ (Hardness)                 | Chemical hardness-DFT                            | $E(\text{LUMO})-E(\text{HOMO})$      |
| 5      | $\chi$ (Electronegativity)        | Electronegativity-DFT                            | $-(E(\text{HOMO})+E(\text{LUMO}))/2$ |
| 6      | $\mu$ (Chemical potential)        | Chemical potential-DFT                           | $(E(\text{HOMO})+E(\text{LUMO}))/2$  |
| 7      | $\omega$ (Electrophilicity index) | Electrophilicity index-DFT                       | $\mu^2/2\eta$                        |
| 8      | d (dipole moment)                 | Dipole moment-DFT                                | Gaussian 09                          |
| 9      | H (enthalpy)                      | Enthalpy-DFT                                     | Gaussian 09                          |
| 10     | G (Gibbs free energy)             | Gibbs free energy-DFT                            | Gaussian 09                          |
| 11     | N-Het                             | No of heteroatoms                                | RDkit                                |
| 12     | Solvent type (ST)                 | ST as a categorical descriptor                   | Reference 1                          |

**Table S2.** List of total no. of molecules used in each class with their means  $E_T(30)$  values.

| Sr. No | Type of Solvent  | Total no. of molecules in each class | Mean $E_T(30)$ values |
|--------|------------------|--------------------------------------|-----------------------|
| 1      | Alcohols/Phenols | 104                                  | 50.03                 |

|    |                                |    |       |
|----|--------------------------------|----|-------|
| 2  | Nitrogen containing compounds  | 73 | 41.37 |
| 3  | Ethers, thioethers and acetals | 47 | 36.92 |
| 4  | Halo-alkanes/alkenes/alkyne    | 43 | 36.91 |
| 5  | Esters                         | 36 | 39.64 |
| 6  | Arenes                         | 29 | 35.93 |
| 7  | Organic salts                  | 18 | 52.47 |
| 8  | Ketones                        | 18 | 40.50 |
| 9  | Alkanes and alkenes            | 16 | 31.71 |
| 10 | Heteroarenes                   | 16 | 40.11 |
| 11 | Sulphur compounds              | 10 | 42.27 |
| 12 | Phosphorous compounds          | 7  | 40.97 |
| 13 | Carboxylic acid/anhydrides     | 4  | 50.10 |

**Table S3. Descriptor Statistics before and after standardization.**

|       | N-Het    | Before Standardization |          |          |          | After Standardization |          |          |            |
|-------|----------|------------------------|----------|----------|----------|-----------------------|----------|----------|------------|
|       |          | E(Energy)              | E(HOMO)  | E(LUMO)  | d        | E(Energy)             | E(HOMO)  | E(LUMO)  | d          |
| count | 421      | 421                    | 421      | 421      | 421      | 421                   | 421      | 421      | 421        |
| mean  | 1.985748 | -685.272               | -0.26117 | -0.02619 | 2.511342 | 8.86E-17              | 4.13E-16 | 2.32E-16 | -7.595E-17 |
| std   | 1.407391 | 876.0235               | 0.033164 | 0.020414 | 2.215839 | 1.00119               | 1.00119  | 1.00119  | 1.0011898  |
| min   | 0        | -7753.86               | -0.35323 | -0.11705 | 0        | -8.07855              | -2.77919 | -4.45607 | -1.1347079 |
| 25%   | 1        | -661.584               | -0.28163 | -0.03299 | 1.36415  | 0.027072              | -0.61768 | -0.33345 | -0.5183396 |
| 50%   | 2        | -387.536               | -0.25871 | -0.01768 | 1.8817   | 0.340277              | 0.074241 | 0.417409 | -0.2844933 |
| 75%   | 2        | -306.057               | -0.23899 | -0.01238 | 3.127199 | 0.433398              | 0.669562 | 0.677341 | 0.2782646  |
| max   | 8        | -62.0569               | -0.1475  | 0.00697  | 15.41071 | 0.71226               | 3.431523 | 1.626338 | 5.8283617  |

## Train:Test Split

A fixed training:test split was used to evaluate the models. The split was random with 90:10 training:test, with proportional data from the different solvent types. Models were built exclusively with the training data and then tested for the test sets. The number of data points in the train and test sets is shown in

**Table S4. Dataset size and train and test set sizes**

| Training:test split ratio | Training set size | Test set size |
|---------------------------|-------------------|---------------|
| 90:10                     | 378               | 43            |
| 80:20                     | 336               | 85            |
| 70:30                     | 294               | 127           |
| 60:40                     | 252               | 169           |

**Table S5. Model evaluation metrics for NN model using 10% train test split.**

| Sr. No. | Regression algorithms | R <sup>2</sup> (cross validation) | RMSE (cross validation) | R <sup>2</sup> (training set) | R <sup>2</sup> (test set) | RMSE (test set) |
|---------|-----------------------|-----------------------------------|-------------------------|-------------------------------|---------------------------|-----------------|
| 1       | MLR                   | 0.696                             | 3.95                    | 0.723                         | 0.673                     | 3.68            |
| 2       | PLS                   | 0.687                             | 4.01                    | 0.709                         | 0.656                     | 3.77            |
| 3       | KNN                   | 0.639                             | 4.28                    | 0.822                         | 0.807                     | 2.83            |
| 4       | SVR                   | 0.700                             | 3.87                    | 0.799                         | 0.858                     | 2.42            |
| 5       | ET                    | 0.857                             | 2.72                    | 1.000                         | 0.952                     | 1.40            |
| 6       | BR                    | 0.792                             | 3.22                    | 0.965                         | 0.897                     | 2.07            |
| 7       | RF                    | 0.811                             | 3.07                    | 0.975                         | 0.927                     | 1.74            |
| 8       | NN                    | 0.929                             | 1.79                    | 0.959                         | 0.960                     | 1.29            |

**Table S6. Model evaluation metrics for NN model using 20% train test split**

| Sr. No. | Regression algorithms | R <sup>2</sup> (cross validation) | RMSE (cross validation) | R <sup>2</sup> (training set) | R <sup>2</sup> (test set) | RMSE (test set) |
|---------|-----------------------|-----------------------------------|-------------------------|-------------------------------|---------------------------|-----------------|
| 1       | MLR                   | 0.664                             | 4.13                    | 0.714                         | 0.735                     | 3.47            |
| 2       | PLS                   | 0.659                             | 4.18                    | 0.701                         | 0.721                     | 3.56            |
| 3       | KNN                   | 0.658                             | 4.20                    | 0.799                         | 0.778                     | 3.17            |
| 4       | SVR                   | 0.696                             | 3.98                    | 0.799                         | 0.824                     | 2.83            |
| 5       | ET                    | 0.830                             | 2.93                    | 1.000                         | 0.920                     | 1.91            |
| 6       | BR                    | 0.746                             | 3.57                    | 0.964                         | 0.837                     | 2.72            |
| 7       | RF                    | 0.789                             | 3.25                    | 0.973                         | 0.844                     | 2.66            |
| 8       | NN                    | 0.910                             | 1.96                    | 0.947                         | 0.925                     | 1.85            |

**Table S7. Model evaluation metrics for NN model using 30% train test split**

| Sr. No. | Regression algorithms | R <sup>2</sup> (cross validation) | RMSE (cross validation) | R <sup>2</sup> (training set) | R <sup>2</sup> (test set) | RMSE (test set) |
|---------|-----------------------|-----------------------------------|-------------------------|-------------------------------|---------------------------|-----------------|
| 1       | MLR                   | 0.645                             | 4.21                    | 0.713                         | 0.719                     | 3.68            |
| 2       | PLS                   | 0.645                             | 4.20                    | 0.697                         | 0.703                     | 3.79            |
| 3       | KNN                   | 0.625                             | 4.41                    | 0.771                         | 0.732                     | 3.60            |
| 4       | SVR                   | 0.680                             | 4.06                    | 0.764                         | 0.790                     | 3.18            |
| 5       | ET                    | 0.803                             | 3.11                    | 1.000                         | 0.916                     | 2.01            |
| 6       | BR                    | 0.733                             | 3.61                    | 0.962                         | 0.877                     | 2.44            |
| 7       | RF                    | 0.749                             | 3.52                    | 0.968                         | 0.875                     | 2.46            |
| 8       | NN                    | 0.924                             | 1.96                    | 0.947                         | 0.911                     | 2.07            |

**Table S8. Model evaluation metrics for NN model using 40% train test split**

| Sr. No. | Regression algorithms | R <sup>2</sup> (cross validation) | RMSE (cross validation) | R <sup>2</sup> (training set) | R <sup>2</sup> (test set) | RMSE (test set) |
|---------|-----------------------|-----------------------------------|-------------------------|-------------------------------|---------------------------|-----------------|
| 1       | MLR                   | 0.649                             | 4.04                    | 0.717                         | 0.705                     | 3.96            |
| 2       | PLS                   | 0.656                             | 4.01                    | 0.706                         | 0.685                     | 4.10            |
| 3       | KNN                   | 0.558                             | 4.56                    | 0.761                         | 0.655                     | 4.29            |
| 4       | SVR                   | 0.669                             | 3.95                    | 0.770                         | 0.738                     | 3.74            |
| 5       | ET                    | 0.810                             | 3.02                    | 1.000                         | 0.843                     | 2.90            |
| 6       | BR                    | 0.676                             | 3.85                    | 0.962                         | 0.814                     | 3.15            |
| 7       | RF                    | 0.697                             | 3.69                    | 0.965                         | 0.817                     | 3.13            |
| 8       | NN                    | 0.889                             | 2.24                    | 0.945                         | 0.872                     | 2.60            |

**Table S9. Train and test set metrics with change in the number of neurons in the NN model.**

| S.No. | Neurons (Hidden Layer-1) | Neurons (Hidden Layer-2) | Neurons (Hidden Layer-3) | R <sup>2</sup> (training set) | R <sup>2</sup> (test set) |
|-------|--------------------------|--------------------------|--------------------------|-------------------------------|---------------------------|
| 1     | 64                       | 128                      | 128                      | 0.959                         | 0.96                      |
| 2     | 64                       | 128                      | 64                       | 0.945                         | 0.946                     |
| 3     | 64                       | 64                       | 64                       | 0.938                         | 0.946                     |
| 4     | 32                       | 64                       | 64                       | 0.927                         | 0.942                     |
| 5     | 16                       | 64                       | 64                       | 0.912                         | 0.925                     |
| 6     | 8                        | 64                       | 64                       | 0.888                         | 0.918                     |

**Table S10. Actual and predicted ET(30) test set values along with the absolute error in the ascending order for 10% train test split using NN model.**

| S.No. | Name of the Molecule              | Actual | Predicted | Absolute Error |
|-------|-----------------------------------|--------|-----------|----------------|
| 1     | ethyl benzoate                    | 38     | 38.0      | 0              |
| 2     | dichloromethane                   | 40.7   | 40.8      | 0.1            |
| 3     | methyl cis-9-octadecanoate        | 34.5   | 34.6      | 0.1            |
| 4     | N,N-Dimethylpropionamide          | 41.8   | 41.9      | 0.1            |
| 5     | ethyl-2-butynoate                 | 40.1   | 40.3      | 0.2            |
| 6     | bromotrchloromethane              | 34.9   | 35.1      | 0.2            |
| 7     | 1,2-dichlorohexafluorocyclobutane | 33.3   | 33.0      | 0.3            |
| 8     | fluorobenzene                     | 37     | 36.7      | 0.3            |
| 9     | diisobutyl ketone                 | 38     | 38.4      | 0.4            |
| 10    | 1,2-dibromopropane                | 39.1   | 39.5      | 0.4            |
| 11    | cyclohexanone                     | 40.1   | 40.5      | 0.4            |
| 12    | 1-cyclohexylpyrrolidin-2-one      | 40.4   | 40.0      | 0.4            |
| 13    | 2-phenoxyethanol                  | 51.5   | 51.9      | 0.4            |

|    |                                          |      |      |     |
|----|------------------------------------------|------|------|-----|
| 14 | 1,3-difluorobenzene                      | 37.3 | 36.8 | 0.5 |
| 15 | 2-butanol                                | 47.1 | 47.6 | 0.5 |
| 16 | 1,3-dichloropropane                      | 40.2 | 40.8 | 0.6 |
| 17 | methyl pentanoate                        | 36.6 | 37.2 | 0.6 |
| 18 | diglyme                                  | 38.6 | 38.0 | 0.6 |
| 19 | triglyme                                 | 38.9 | 39.5 | 0.6 |
| 20 | 3,4-xylenol                              | 47.2 | 46.6 | 0.6 |
| 21 | Di-n-propyl ether                        | 34   | 34.8 | 0.8 |
| 22 | 1-formylpiperidine                       | 41.7 | 42.6 | 0.9 |
| 23 | tert-butyl methyl ether                  | 34.5 | 35.5 | 1   |
| 24 | dimethyl sulfane                         | 36.8 | 35.8 | 1   |
| 25 | sulfolane                                | 44.1 | 43.1 | 1   |
| 26 | 2,5-dibromo-1-methylbenzene              | 34.7 | 35.9 | 1.2 |
| 27 | tri-n-butyl-n-dodecylphosphonium bromide | 44.5 | 43.3 | 1.2 |
| 28 | N-methylformamide                        | 54.1 | 52.9 | 1.2 |
| 29 | N-(tert-butyl)benzylamine                | 34.9 | 36.2 | 1.3 |
| 30 | quinoline                                | 39.4 | 38.0 | 1.4 |
| 31 | 1-heptanol                               | 48.5 | 47.1 | 1.4 |
| 32 | N,N-diethylcyanamide                     | 43.3 | 41.8 | 1.5 |
| 33 | 1,1,2-trichlorotrifluoroethane           | 33.2 | 34.8 | 1.6 |
| 34 | 2-ethoxyethanol                          | 51   | 49.4 | 1.6 |
| 35 | 2-chloropyridine                         | 41.9 | 40.0 | 1.9 |
| 36 | ethylene carbonate                       | 48.6 | 46.7 | 1.9 |
| 37 | 1-phenylethanol                          | 46.7 | 48.7 | 2   |
| 38 | n-butylammonium thiocyanate              | 61.4 | 59.4 | 2   |
| 39 | 1,3-propanediol                          | 54.9 | 52.7 | 2.2 |
| 40 | trichlorofluoromethane                   | 33.2 | 35.5 | 2.3 |
| 41 | N,N-dimethylthioformamide                | 44   | 41.4 | 2.6 |
| 42 | N,N-diethylformamide                     | 41.8 | 44.5 | 2.7 |
| 43 | pyrrolidine                              | 39.1 | 36.3 | 2.8 |
|    | Average                                  |      |      | 1.0 |

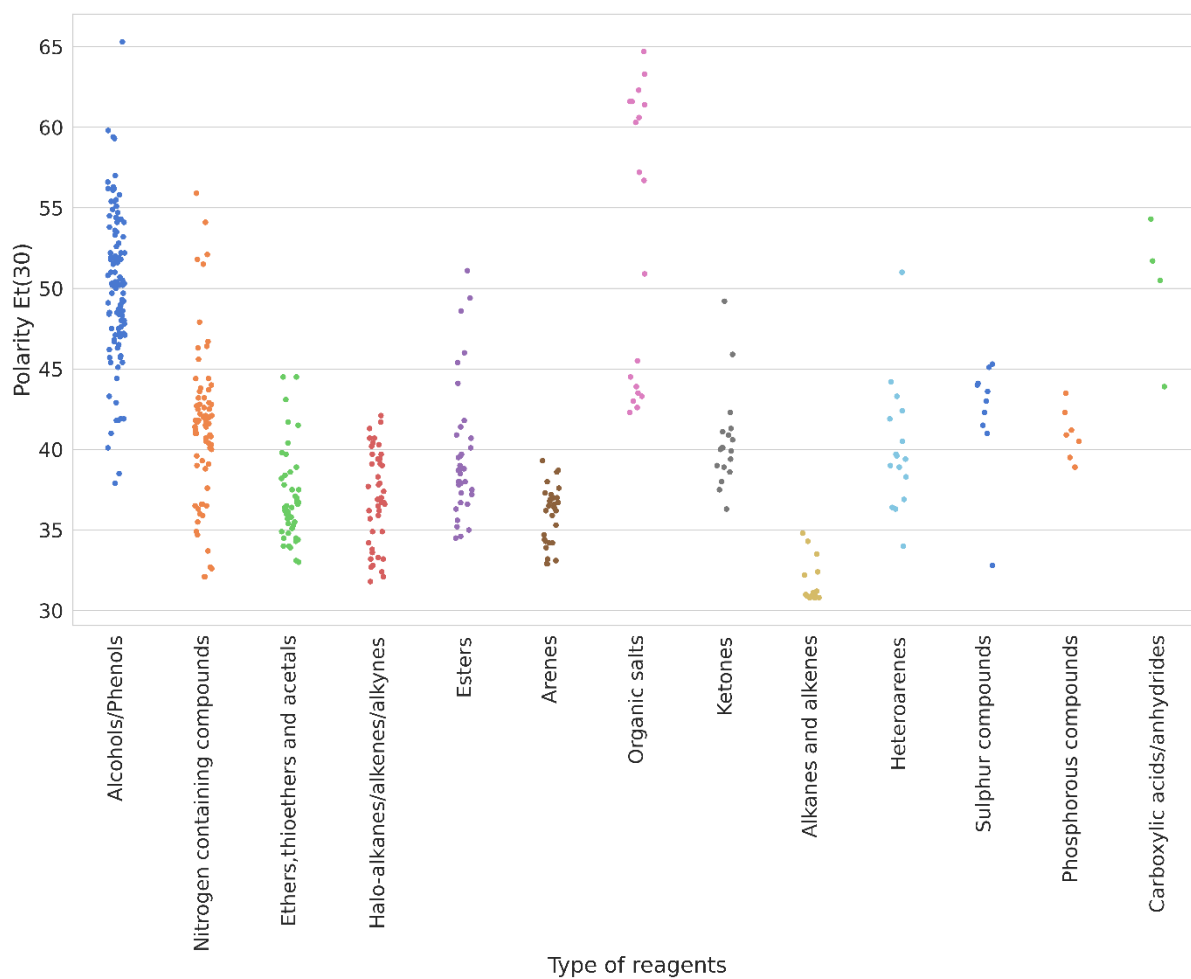

Figure S1. Strip plot depicting range of  $E_T(30)$  values across 13 different categories of solvents.



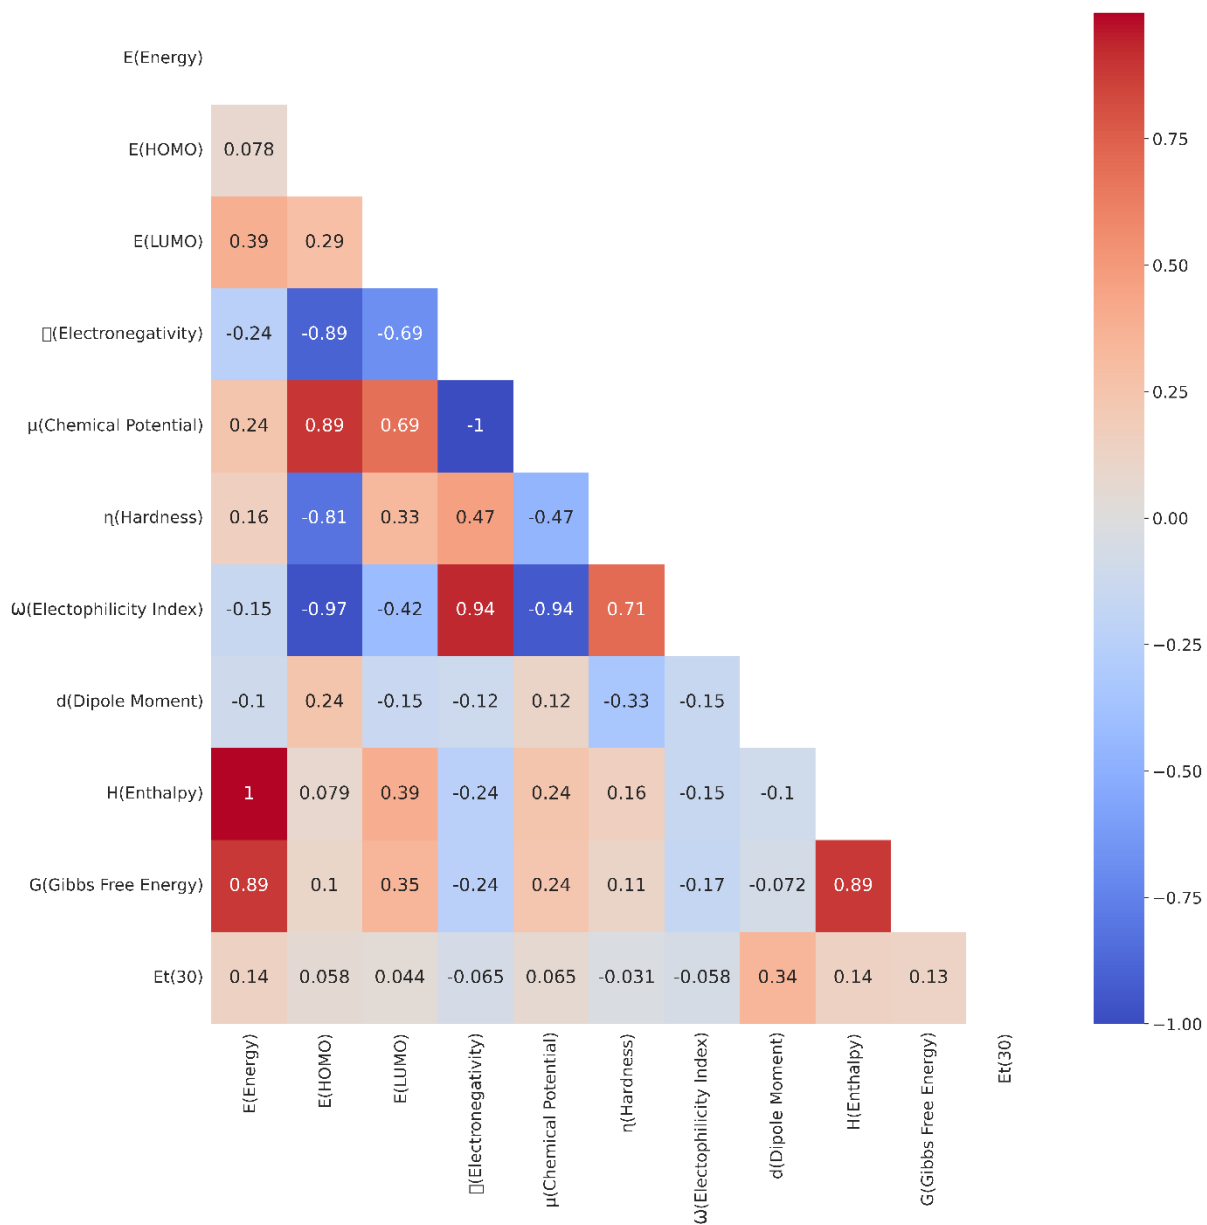

Figure S2. Confusion matrix showing Pearson coefficient ( $r$ ) for 10 quantum chemical descriptors and  $E_T(30)$ .

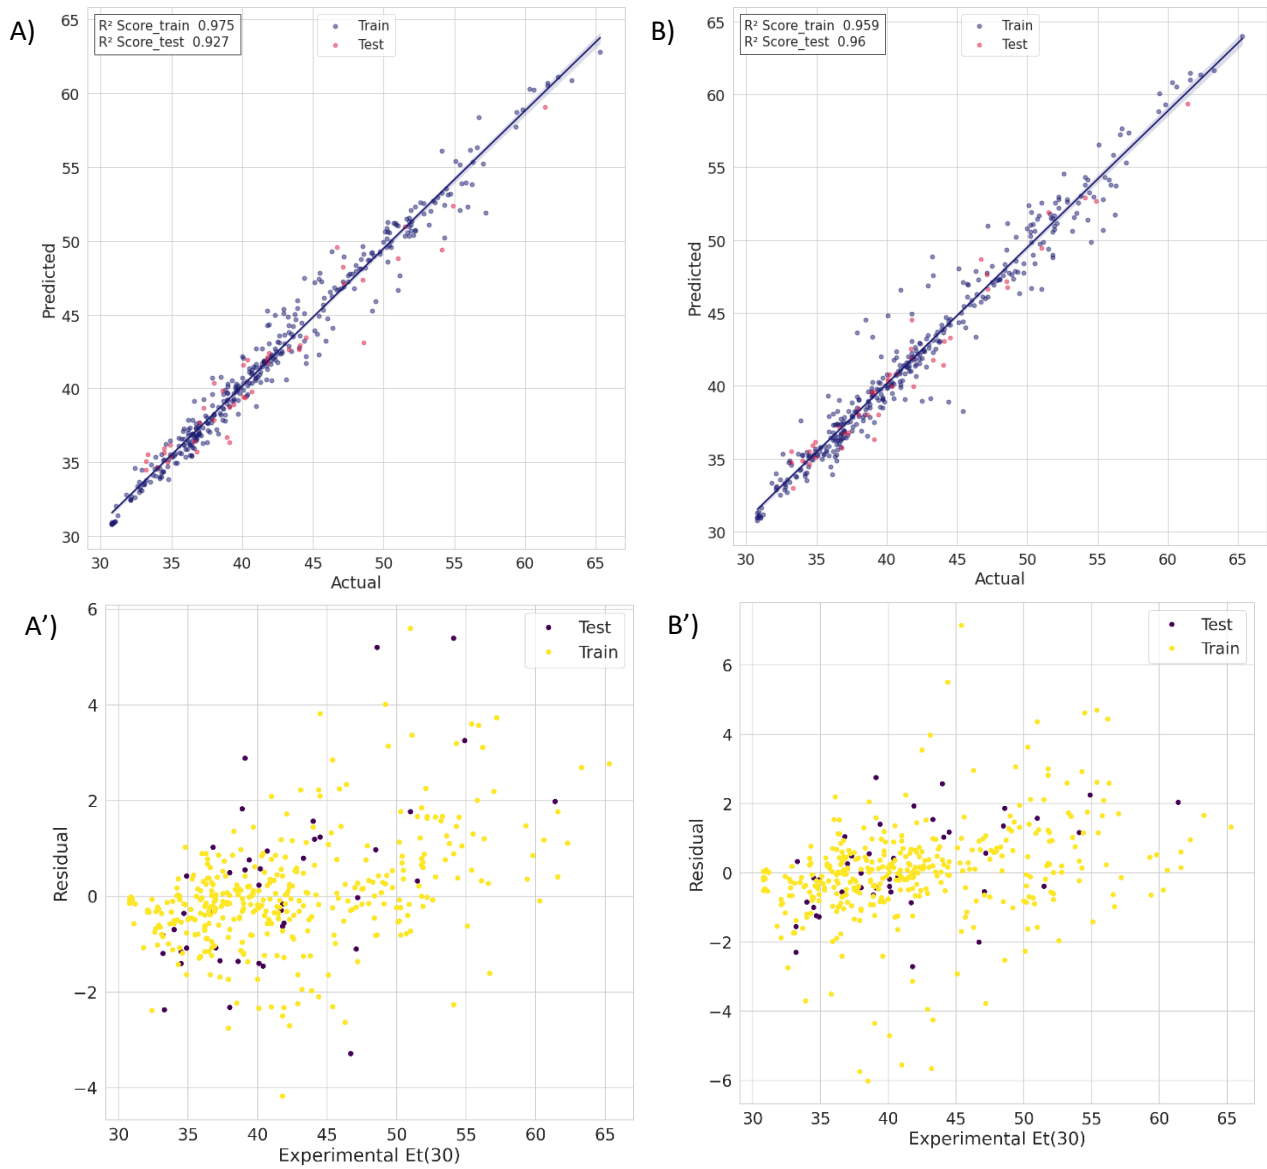

**Figure S3. Regression and residual plots showing test and train data points and their  $R^2$  values for; A) RF regression plot, B) NN regression plot, C) RF residual plot, D) NN residual plot.**

## References:

1. C. Reichardt, Solvatochromic Dyes as Solvent Polarity Indicators, *Chem. Rev.*, 1994, **94**, 2319-2358.
2. J. P. Cerón-Carrasco, D. Jacquemin, C. Laurence, A. Planchat, C. Reichardt and K. Sraïdi, Solvent polarity scales: determination of new ET(30) values for 84 organic solvents, *J. Phys. Org. Chem.*, 2014, **27**, 512-518.
3. M. J. Frisch, G. W. Trucks, H. B. Schlegel, G. E. Scuseria, M. A. Robb, J. R. Cheeseman, G. Scalmani, V. Barone, G. A. Petersson, H. Nakatsuji, X. Li, M. Caricato, A. V. Marenich, J. Bloino, B. G. Janesko, R. Gomperts, B. Mennucci, H. P. Hratchian, J. V. Ortiz, A. F. Izmaylov, J. L. Sonnenberg, Williams, F. Ding, F. Lipparini, F. Egidi, J. Goings, B. Peng, A. Petrone, T. Henderson, D. Ranasinghe, V. G. Zakrzewski, J. Gao, N. Rega, G. Zheng, W. Liang, M. Hada, M. Ehara, K. Toyota, R. Fukuda, J. Hasegawa, M. Ishida, T. Nakajima, Y. Honda, O. Kitao, H. Nakai, T. Vreven, K. Throssell, J. A. Montgomery Jr., J. E. Peralta, F. Ogliaro, M. J. Bearpark, J. J. Heyd, E. N. Brothers, K. N. Kudin, V. N. Staroverov, T. A. Keith, R. Kobayashi, J. Normand, K. Raghavachari, A. P. Rendell, J. C. Burant, S. S. Iyengar, J. Tomasi, M. Cossi, J. M. Millam, M. Klene, C. Adamo, R. Cammi, J. W. Ochterski, R. L. Martin, K. Morokuma, O. Farkas, J. B. Foresman and D. J. Fox, Gaussian 16 Rev. C.01. Gaussian, Inc.: Wallingford CT, 2016.
4. M. Karelson, V. S. Lobanov and A. R. Katritzky, Quantum-Chemical Descriptors in QSAR/QSPR Studies, *Chem. Rev.*, 1996, **96**, 1027-1044.
